# Supplementary material for: Formation of secondary organic aerosol coating on black carbon particles near vehicular emissions
Source: Copernicus journal article supplement (doi:10.5194/acp-2017-665), 2017-07-31
Supplement: Supplementary file 1 [file acp-2017-665-supplement.pdf]

# Formation of secondary organic aerosol coating on black carbon particles near vehicular emissions

Alex K. Y. Lee<sup>1</sup>, Chia-Li Chen<sup>2</sup>, Jun Liu<sup>2</sup>, Derek J. Price<sup>2</sup>, Raghu Betha<sup>2</sup>, Lynn M. Russell<sup>2</sup>, Xiaolu  
5 Zhang<sup>3</sup> and Christopher D. Cappa<sup>3</sup>

<sup>1</sup>Department of Civil and Environmental Engineering, National University of Singapore, Singapore

<sup>2</sup>Scripps Institution of Oceanography, University of California, San Diego, USA

<sup>3</sup>Department of Civil and Environmental Engineering, University of California, Davis, USA

10

*Correspondence to:* Alex K. Y. Lee (ceelkya@nus.edu.sg)

**Supplementary information**

## PMF analysis

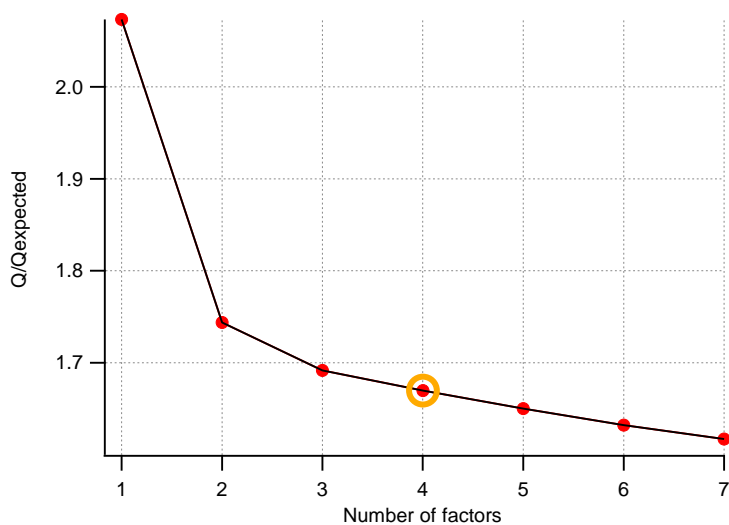

- 5 Figure S1:  $Q/Q_{\text{expected}}$  values as a function of number of PMF factors. A 4-factor solution, including two POA factors from traffic emissions and two SOA factors due to local photochemistry, was determined as a final solution.

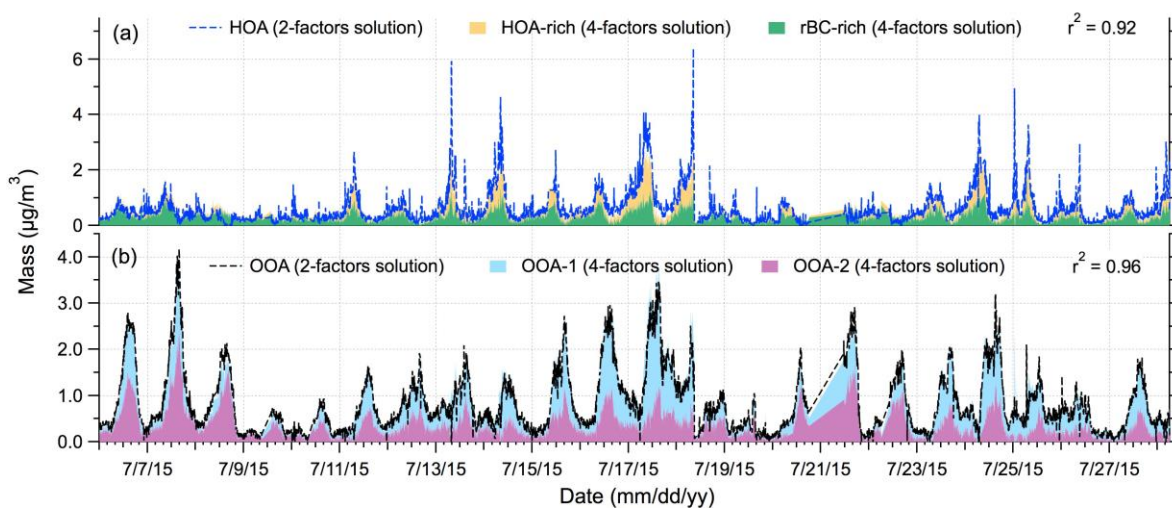

10

Figure S2: Time series of 2-factor solution: (a) HOA and (b) OOA. Increasing the number of PMF factors to four splits HOA into HOA-rich and rBC-rich factors and OOA into OOA-1 and OOA-2 factors. The physical meaning of individual factors are described in the main text.

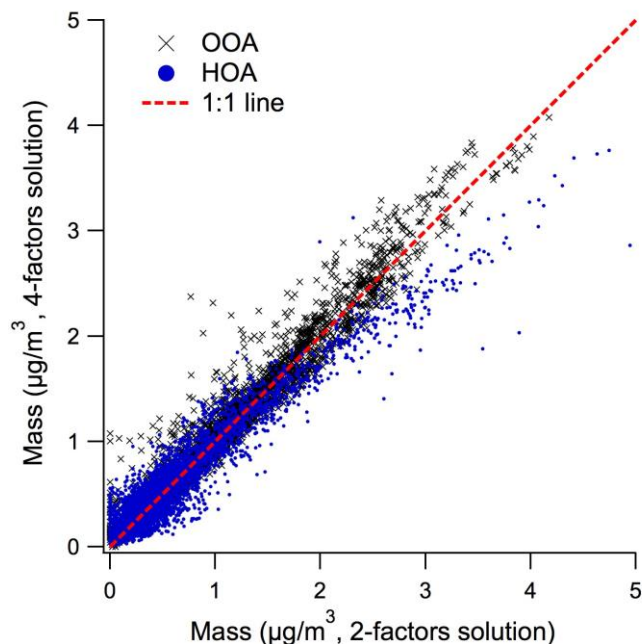

Figure S3: Correlations between 4-factor and 2-factor solutions: (HOA-rich + rBC-rich) vs. HOA and (OOA-1 + OOA-2) vs. OOA.

5

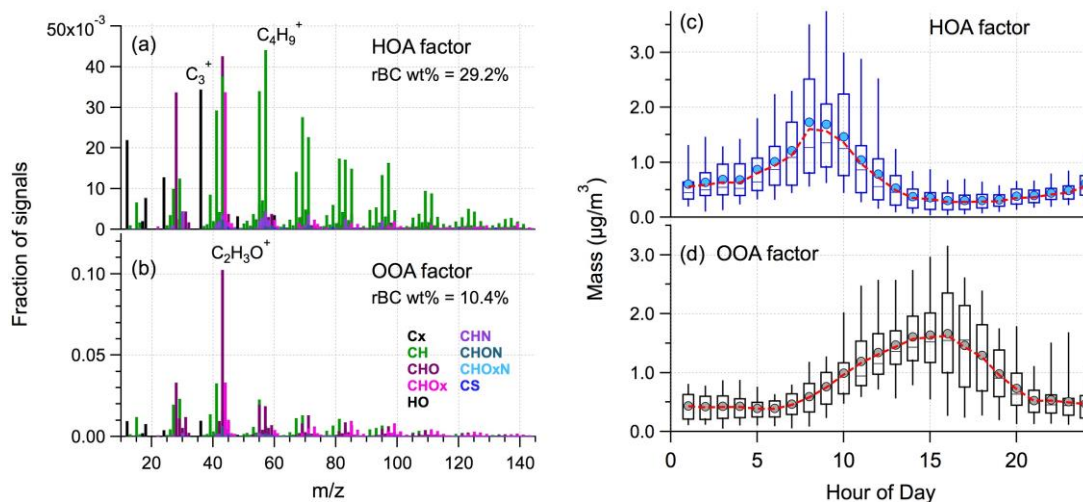

Figure S4: Mass spectra (a-b) and diurnal cycles (c-d) of 2-factor solution from SP-AMS data within the hot period. (Box plots: 5<sup>th</sup>, 25<sup>th</sup>, 50<sup>th</sup>, 75<sup>th</sup> and 95<sup>th</sup> percentile, Filled circles: mean values for organic + C<sub>x</sub><sup>+</sup> fragments, Red dashed lines: mean values for organic alone)

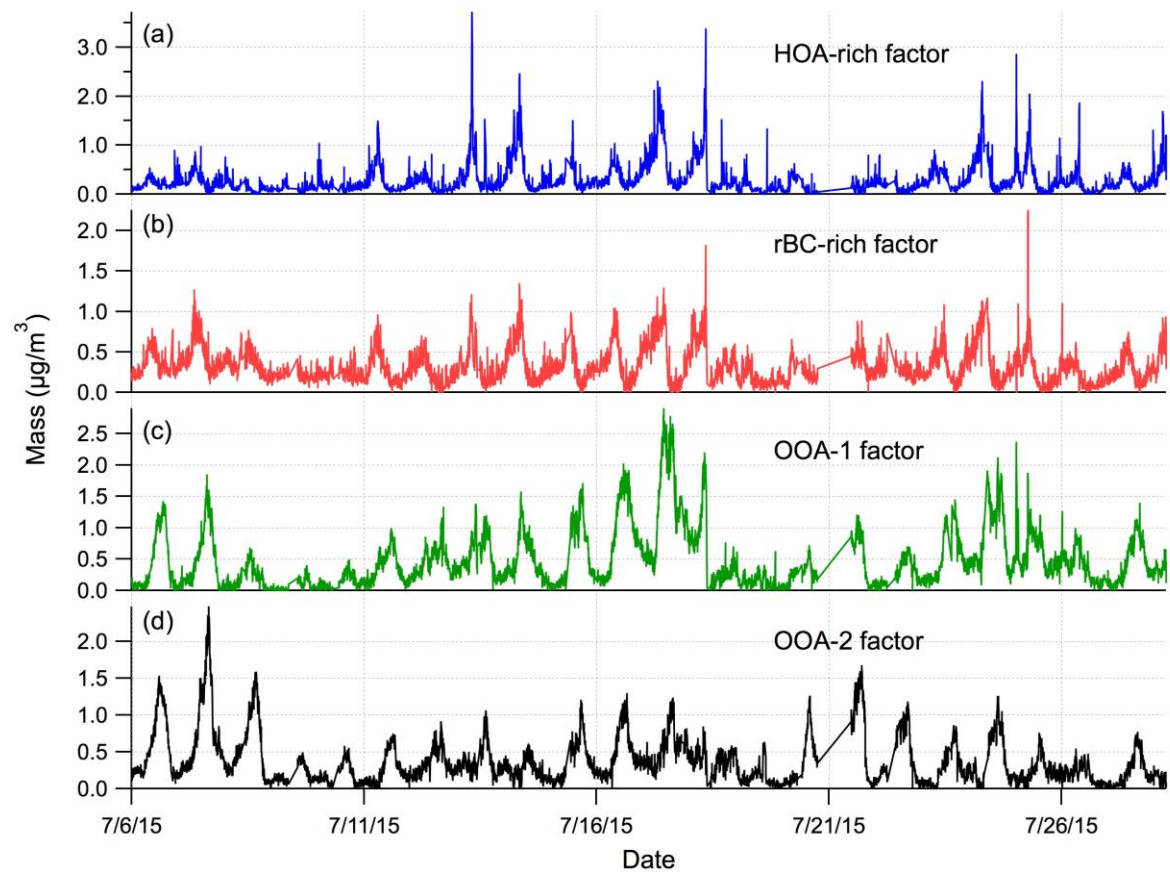

Figure S5: Time series of the 4-factor solution: (a) HOA-rich, (b) rBC-rich, (c) OOA-1, and (d) OOA-2.

5

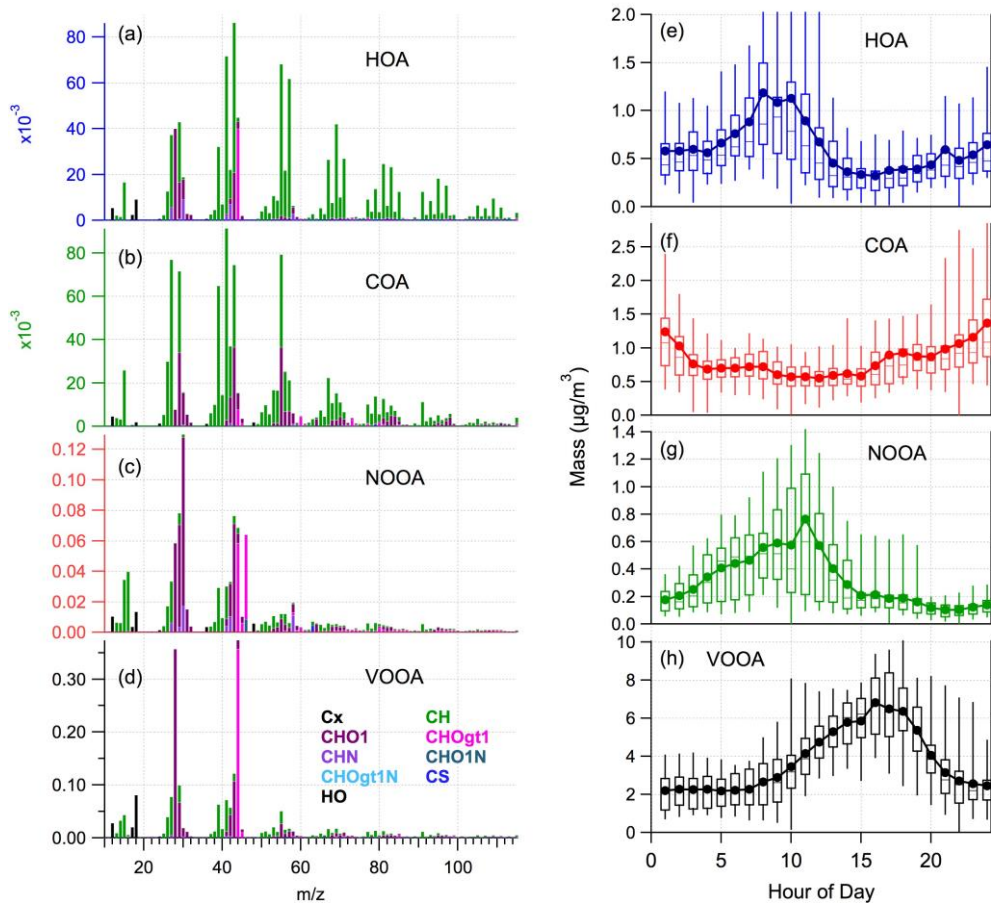

Figure S6: Mass spectra (a-d) and diurnal cycles (e-h) of 4-factor solution from HR-ToF-AMS data within the hot period. (Box plots: 5<sup>th</sup>, 25<sup>th</sup>, 50<sup>th</sup>, 75<sup>th</sup> and 95<sup>th</sup> percentile, Filled circles: mean values) (Chen et al., 2017)

### References:

- Chen, C.-L., Chen, S., Russell, L. M., Liu, J., Price, D. J., Betha, R., Sanchez, K. J., Lee A. K. Y., Collier, S. C., Zhang, Q., Kumar, A., Kleeman, M., Zhang, X., and Cappa, C. D.: Organic aerosol particle chemical properties associated with residential burning and fog in wintertime San Joaquin Valley (Fresno) and with vehicle and firework emissions in summertime South Coast Air Basin (Fontana), under review.
